# Supplementary material
Source: PubMed Central journal article supplement (PMC5035231)
Supplement: NIHMS809553-supplement-Supp_info.pdf [file NIHMS809553-supplement-Supp_info.pdf]

## **Supplementary Information**

**The genes that encode the gonococcal transferrin binding proteins, *tbpB* and *tbpA*, are differentially regulated by MisR under iron-replete and iron-depleted conditions**

Justin L. Kandler<sup>1#∞</sup>, Rosuany Vélez Acevedo<sup>4^∞</sup>, Mary Kathryn Dickinson<sup>4~</sup>, Devin R. Cash<sup>4</sup>, William M. Shafer<sup>1,2,3</sup>, and Cynthia Nau Cornelissen<sup>4\*</sup>

Department of Microbiology and Immunology<sup>1</sup> and Emory Antibiotic Resistance Center<sup>2</sup>, Emory University School of Medicine, Atlanta, Georgia; Laboratories of Microbial Pathogenesis, Department of Veterans Affairs Medical Center, Decatur, Georgia<sup>3</sup>; Department of Microbiology and Immunology, Virginia Commonwealth University Health System, Richmond, Virginia<sup>4</sup>.

Running title: MisR regulates the *tbpBA* operon in *N. gonorrhoeae*

\* Address correspondence to: Cynthia Nau Cornelissen, [cynthia.cornelissen@vcuhealth.org](mailto:cynthia.cornelissen@vcuhealth.org)

**Supplemental Table S1**  
**RNA-Seq analysis of the *misR* regulon in *N. gonorrhoeae* strain FA19**

**MisR-repressed genes**

| <b>Gene</b>                             | <b>ORF<br/>(FA1090<br/>designation)</b> | <b><sup>a</sup>Fold Change<br/>(<i>misR</i><sup>-</sup>/WT)</b> | <b><sup>b</sup>Bonferroni<br/>value</b> | <b><sup>c</sup>Function</b>                                                                                                                        |
|-----------------------------------------|-----------------------------------------|-----------------------------------------------------------------|-----------------------------------------|----------------------------------------------------------------------------------------------------------------------------------------------------|
| <i>nadC</i>                             | NGO0377†                                | 10.42                                                           | 0.00E+00                                | putative NadC family sodium/dicarboxylate symporter                                                                                                |
| <i>lctP<sub>trunc</sub></i>             | NGO1361†                                | 9.54                                                            | 1.60E-11                                | putative L-lactate permease (truncated)                                                                                                            |
| <i>marR2</i>                            | NGO1244†                                | 5.90                                                            | 2.04E-05                                | MarR family protein (regulator of multiple antibiotic resistance)                                                                                  |
| <i>tbpB</i>                             | NGO1496†                                | 5.76                                                            | 0.00E+00                                | transferrin-binding protein, TbpB                                                                                                                  |
| <sup>d</sup> <i>tdf<sub>trunc</sub></i> | NGO1362†                                | 5.65                                                            | 1.90E-04                                | putative TonB-dependent iron siderophore receptor (truncated)                                                                                      |
| <i>ppk2</i>                             | NGO2113                                 | 5.05                                                            | 0.00E+00                                | putative polyphosphate kinase 2 (catalyzes the transfer of inorganic phosphate from poly P to GDP to create GTP, an important signalling molecule) |
| <i>clpB</i>                             | NGO1046                                 | 5.01                                                            | 0.00E+00                                | ClpB molecular chaperone                                                                                                                           |
|                                         | NGO1546                                 | 4.15                                                            | 3.33E-11                                | putative S-adenosyl-L-methionine-dependent methyltransferase                                                                                       |
| <i>opdA</i>                             | NGO1770                                 | 4.03                                                            | 4.45E-13                                | oligopeptidase A                                                                                                                                   |
|                                         | NGO1245†                                | 4.02                                                            | 4.07E-06                                | putative integral membrane protein (multidomain homology to an ABC-type multidrug transport system—ATPase and permease components)                 |
|                                         | NGO0651                                 | 3.32                                                            | 0.00E+00                                | S-adenosylmethionine-dependent methyltransferase                                                                                                   |
|                                         | NGO1287                                 | 3.15                                                            | 0.00E+00                                | Ras-like GTPase                                                                                                                                    |
| <i>tbpA</i>                             | NGO1495†                                | 3.05                                                            | 0.00E+00                                | transferrin-binding protein TbpA                                                                                                                   |

|              |          |      |          |                                                                                                                        |
|--------------|----------|------|----------|------------------------------------------------------------------------------------------------------------------------|
| <i>GAPDH</i> | NGO1776  | 3.04 | 0.00E+00 | glyceraldehyde-3-phosphate dehydrogenase                                                                               |
| <i>opcA</i>  | NGO0868  | 2.84 | 1.33E-05 | outer membrane protein (adhesion and invasion)                                                                         |
| <i>lon</i>   | NGO0775  | 2.79 | 0.00E+00 | Lon serine protease—hydrolyses ATP to degrade protein substrates                                                       |
|              | NGO1588  | 2.78 | 0.00E+00 | uncharacterized conserved neisserial protein                                                                           |
| <i>grx</i>   | NGO0114  | 2.69 | 2.87E-09 | glutaredoxin 3 [GRX is a glutathione (GSH) dependent reductase, catalyzing the disulfide reduction of target proteins] |
| <i>pitB</i>  | NGO1581  | 2.66 | 0.00E+00 | predicted phosphate transport permease                                                                                 |
|              | NGO2014† | 2.64 | 0.00E+00 | predicted periplasmic binding protein; ABC transporter probably involved in glutamine transport                        |
| <i>ppiB</i>  | NGO0376† | 2.64 | 0.00E+00 | peptidyl-prolyl cis-trans isomerase B                                                                                  |
| <i>grpE</i>  | NGO1422  | 2.62 | 0.00E+00 | GrpE co-chaperone; GrpE is the adenine nucleotide exchange factor of DnaK (Hsp70)-type ATPases                         |
| <i>mpeR</i>  | NGO0025  | 2.55 | 2.17E-02 | Mtr protein efflux regulator                                                                                           |
| <i>rpe</i>   | NGO0758  | 2.55 | 0.00E+00 | ribulose-5-phosphate 3-epimerase                                                                                       |
| <i>scpA</i>  | NGO0961  | 2.49 | 5.29E-02 | segregation and condensation protein A; involved in chromosomal partitioning during cell division                      |
| <i>recN</i>  | NGO0318  | 2.41 | 0.00E+00 | ATP-binding DNA repair protein                                                                                         |
| <i>glnA</i>  | NGO1600  | 2.40 | 7.02E-03 | glutamine synthetase                                                                                                   |
| <i>putP</i>  | NGO1552  | 2.37 | 0.00E+00 | highly conserved bacterial sodium/proline symporter                                                                    |

|              |          |      |          |                                                                                                        |
|--------------|----------|------|----------|--------------------------------------------------------------------------------------------------------|
| <i>glnQ</i>  | NGO2013† | 2.35 | 2.81E-10 | GlnQ ATP-binding component of the bacterial periplasmic glutamine permease                             |
|              | NGO0834  | 2.32 | 4.18E-09 | CsgG-family lipoprotein (CsgG is involved in curli formation in <i>E. coli</i> )                       |
| <i>thiO</i>  | NGO2008† | 2.27 | 2.75E-06 | putative glycine oxidase with minimal identity to ThiO                                                 |
| <i>cytX</i>  | NGO2009† | 2.24 | 0.00E+00 | putative hydroxymethyl-pyrimidine transporter CytX involved in thiamine production                     |
| <i>rusA</i>  | NGO0489  | 2.23 | 3.24E-02 | putative endodeoxyribonuclease/Holliday junction resolvase RusA                                        |
| <i>sdhD</i>  | NGO0922† | 2.23 | 1.49E-02 | succinate:quinone oxidoreductase                                                                       |
| <i>kdtA</i>  | NGO1915  | 2.23 | 2.18E-05 | putative KdtA (3-deoxy-D-manno-octulosonic-acid transferase a.k.a. kdotransferase)                     |
| <i>acnB</i>  | NGO1231  | 2.23 | 0.00E+00 | aconitate hydratase B (catalyses the formation of cis-aconitate from citrate as part of the TCA cycle) |
| <i>dnaK</i>  | NGO1429  | 2.20 | 0.00E+00 | DnaK (a.k.a. Hsp70) chaperone                                                                          |
| <i>potD</i>  | NGO1494  | 2.19 | 1.60E-11 | PotD (spermidine/putrescine-binding periplasmic protein)                                               |
|              | NGO0165  | 2.18 | 2.86E-02 | conserved hypothetical protein of unknown function                                                     |
|              | NGO0115  | 2.18 | 3.33E-10 | hypothetical protein of unknown function                                                               |
|              | NGO1582† | 2.18 | 2.97E-06 | conserved hypothetical protein of unknown function                                                     |
| <i>mafA3</i> | NGO1584† | 2.17 | 1.69E-07 | putative adhesin MafA3                                                                                 |
| <i>thiC</i>  | NGO2041  | 2.14 | 1.11E-03 | ThiC; participates in the formation of 4-amino-5-hydroxymethyl-2-methylpyrimidine from AIR, an         |

|                 |                      |      |          |                                                                                                       |
|-----------------|----------------------|------|----------|-------------------------------------------------------------------------------------------------------|
|                 |                      |      |          | intermediate in de novo pyrimidine biosynthesis                                                       |
| <i>tmp/tenI</i> | NGO2007 <sup>†</sup> | 2.10 | 1.38E-06 | TMP thiamine monophosphate synthase; catalyzes an important step in the thiamine biosynthesis pathway |
| <i>mafA2</i>    | NGO1393              | 2.08 | 2.22E-12 | putative adhesin MafA2                                                                                |
| <i>gltA</i>     | NGO0918              | 2.07 | 0.00E+00 | GltA-like citrate synthase (CS)                                                                       |
| <i>shmt</i>     | NGO0866 <sup>†</sup> | 2.06 | 4.89E-12 | serine/glycine hydroxymethyl-transferase                                                              |
|                 | NGO0865 <sup>†</sup> | 2.02 | 1.07E-11 | hypothetical protein of unknown function                                                              |
| <i>rpoH</i>     | NGO0288              | 2.01 | 0.00E+00 | alternative sigma factor RpoH; sigma-32, sigma factor H, heat shock sigma factor                      |
| <i>yojH</i>     | NGO1980              | 2.00 | 0.00E+00 | YojH malate:quinone-oxidoreductase                                                                    |
| <i>tnaB</i>     | NGO2073              | 2.00 | 4.45E-13 | TnaB tryptophan permease                                                                              |
| <i>sdhA</i>     | NGO0921 <sup>†</sup> | 1.99 | 1.78E-12 | SdhA succinate dehydrogenase/fumarate reductase                                                       |
| <i>trxI</i>     | NGO0652              | 1.99 | 1.59E-06 | TRX(I) thioredoxin I                                                                                  |
|                 | NGO1864              | 1.97 | 8.78E-04 | conserved bacterial protein of unknown function                                                       |
| <i>hsp33</i>    | NGO1189              | 1.86 | 0.00E+00 | Hsp33                                                                                                 |

### **MisR-activated genes**

|             |                      |       |          |                                                 |
|-------------|----------------------|-------|----------|-------------------------------------------------|
| <i>nlpC</i> | NGO1190 <sup>†</sup> | -2.02 | 6.54E-05 | NlpC/P60 family cell envelope protein           |
|             | NGO0420              | -2.03 | 3.14E-07 | COG3471, predicted periplasmic/secreted protein |
| <i>ftsL</i> | NGO1543 <sup>†</sup> | -2.04 | 2.62E-07 | FtsL cell division protein                      |
| <i>dca</i>  | NGO1540 <sup>†</sup> | -2.08 | 1.69E-23 | Dca putative membrane associated sulfatase      |

|                  |          |       |          |                                                                                                                                                                         |
|------------------|----------|-------|----------|-------------------------------------------------------------------------------------------------------------------------------------------------------------------------|
| <i>clpA</i>      | NGO0408  | -2.10 | 1.21E-14 | ClpA ATP-binding subunit of the Clp protease                                                                                                                            |
| <i>rpmB</i>      | NGO1680  | -2.23 | 1.19E-09 | RpmB 50S ribosomal protein L28                                                                                                                                          |
|                  | NGO1282  | -2.23 | 2.72E-02 | hypothetical protein of unknown function (3' of <i>serC</i> sequence and 5' of <i>lptA</i> sequence)                                                                    |
| <i>exoIII</i>    | NGO1561  | -2.24 | 1.28E-12 | highly conserved DNA exonuclease III (exodeoxyribonuclease III)                                                                                                         |
| <i>pbp2</i>      | NGO1542† | -2.31 | 6.84E-59 | PBP2 penicillin-binding protein 2 peptidoglycan transpeptidase                                                                                                          |
| <i>nrdA</i>      | NGO0614† | -2.32 | 1.29E-30 | NrdA ribonucleotide-diphosphate reductase subunit alpha                                                                                                                 |
|                  | NGO0867  | -2.34 | 3.94E-22 | predicted transcriptional regulator (Helix-turn-helix XRE-family like protein)                                                                                          |
| <i>tatB</i>      | NGO0182† | -2.40 | 7.49E-77 | twin arginine-targeting protein translocase TatB (Sec-independent protein translocase)                                                                                  |
|                  | NGO1556  | -2.45 | 1.95E-02 | conserved hypothetical protein (100% homologous duplication of NGO1462)                                                                                                 |
| <i>arsB/nhaD</i> | NGO1411  | -2.46 | 1.97E-36 | predicted anion permease ArsB/NhaD; these permeases have been shown to translocate sodium, arsenate, antimonite, sulfate and organic anions across biological membranes |
| <i>mraW</i>      | NGO1544† | -2.46 | 4.98E-19 | MraW S-adenosyl-methyltransferase                                                                                                                                       |
|                  | NGO0722  | -2.46 | 1.10E-05 | putative phage associated protein of unknown function                                                                                                                   |
|                  | NGO0618  | -2.57 | 1.66E-24 | conserved hypothetical protein of unknown function                                                                                                                      |
|                  | NGO1191† | -2.58 | 2.88E-14 | conserved hypothetical protein of unknown function                                                                                                                      |

|               |          |       |          |                                                                                      |
|---------------|----------|-------|----------|--------------------------------------------------------------------------------------|
| <i>macA</i>   | NGO1440† | -2.69 | 1.68E-49 | MacA (membrane fusion component of the MacAB macrolide efflux pump)                  |
| <i>nrdB</i>   | NGO0615† | -2.69 | 2.73E-53 | NrdB ribonucleoside-diphosphate reductase                                            |
|               | NGO1462  | -2.77 | 9.06E-03 | hypothetical protein of unknown function                                             |
| <i>mraZ</i>   | NGO1545† | -2.83 | 6.04E-04 | MraZ cell division protein                                                           |
| <i>rpmE</i>   | NGO2126  | -3.07 | 6.17E-29 | RpmE 50S ribosomal subunit protein L31                                               |
| <i>bfrA</i>   | NGO0794† | -3.26 | 2.98E-05 | BfrA bacterioferritin                                                                |
| <i>macB</i>   | NGO1439† | -3.31 | 5.07E-38 | MacB (ATP-binding permease protein component of the MacAB macrolide efflux pump)     |
|               | NGO1412  | -3.46 | 3.00E-02 | IS1016 transposase                                                                   |
|               | NGO1861  | -3.51 | 1.76E-15 | conserved gonococcal hypothetical protein                                            |
| <i>rplL</i>   | NGO1852  | -3.59 | 3.44E-18 | L7/L12 ribosomal protein                                                             |
| <i>laz</i>    | NGO0994  | -3.76 | 4.81E-03 | Laz azurin (a copper-binding protein in the plastocyanin/azurin family)              |
| <i>bfrB</i>   | NGO0795† | -3.79 | 8.18E-80 | BfrB bacterioferritin                                                                |
| <i>htpX</i>   | NGO0399  | -3.84 | 1.04E-05 | HtpX heat shock protein that endoproteolytically cleaves misfolded membrane proteins |
|               | NGO1215  | -5.65 | 6.64E-03 | COG2847; putative copper (I) binding envelope protein                                |
|               | NGO1981  | -6.00 | 3.71E-13 | hypothetical protein of unknown function                                             |
|               | NGO0179† | -6.90 | 6.42E-03 | hypothetical protein of unknown function                                             |
| <i>hlyIII</i> | NGO1289  | -7.76 | 1.69E-08 | conserved protein homologous to the HlyIII channel-forming cytotoxin                 |

|              |                      |        |          |                                                                                                |
|--------------|----------------------|--------|----------|------------------------------------------------------------------------------------------------|
| <i>dsbD</i>  | NGO0978              | -9.21  | 1.89E-42 | DsbD (thiol:disulfide interchange protein)                                                     |
| <i>maf</i>   | NGO0180 <sup>†</sup> | -11.90 | 7.11E-10 | predicted Maf family nucleotide binding protein involved in septation                          |
| <i>ompA</i>  | NGO1559              | -17.48 | 4.56E-03 | OmpA family protein                                                                            |
| <i>imm22</i> | NGO1590              | -18.50 | 7.72E-11 | putative immunity/antitoxin protein (encoded next to a putative toxin gene encoded by NGO1589) |
| <i>tatC</i>  | NGO0181 <sup>†</sup> | -24.34 | 2.71E-57 | TatC Sec-independent protein translocase component                                             |

<sup>†</sup>genes that are adjacent to and encoded in the same orientation as other MisR regulatory targets (i.e., possibly coregulated by MisR as part of an operon).

**Repressed groups:** NGO0376/NGO0377 (*ppiB/nadC*); NGO0865/NGO0866 (*hypo/shmt*); NGO0921/NGO0922 (*sdhA/sdhD*); NGO1244/NGO1245 (*marR2/hypo* ATPase and permease); NGO1361/NGO1362 (*lctP<sub>trunc</sub>/tdf<sub>trunc</sub>*); NGO1495/NGO1496 (*tbpA/tbpB*); NGO1582/NGO1584 (*hypo/mafA3*); NGO2007/NGO2008/NGO2009 (*tmp/thiO/cytX*); NGO2013/NGO2014 (*glnQ/amino acid transporter*).

**Activated groups:** NGO0179/NGO0180/NGO0181/NGO0182 (*hypo/maf/tatC/tatB*); NGO0614/NGO0615 (*nrdA/nrdB*); NGO0794/NGO0795 (*bfrA/bfrB*); NGO1190/NGO1191 (*nlpC/hypo*); NGO1439/NGO1440 (*macB/macA*); NGO1540/NGO1542/NGO1543/NGO1544/NGO1545 (*dca/pbp2/ftsL/mraW/mraZ*)

<sup>a</sup> Fold change is calculated as the ratio of reads-per-kilobase-per-million-reads (RPKM) values for each gene in the FA19 *misR::kan* cells/FA19 WT cells. These data are representative of three independent comparisons.

<sup>b</sup> The Bonferroni Correction (<http://mathworld.wolfram.com/BonferroniCorrection.html>), which is a multiple-comparison correction used when several dependent or independent statistical tests are being performed simultaneously, was performed as a more stringent method of determining whether or not fold change values show statistical significance. Fold changes with Bonferroni values >0.05 were considered non-significant.

<sup>c</sup> Protein functions were determined using a BLAST search (<http://blast.ncbi.nlm.nih.gov/Blast.cgi>) on the NGO designation of the gene, followed by a characterization of any conserved domains present using the Conserved Domain Database (<http://www.ncbi.nlm.nih.gov/Structure/cdd/wrpsb.cgi>).

<sup>d</sup> “*tdf*” refers to the “TonB-dependent function” naming scheme.

See Cornelissen and Hollander, 2011, TonB-dependent transporters expressed by *N. gonorrhoeae*, Front. Microbio. 2 (117):1-13.



## Supplemental Figure S1

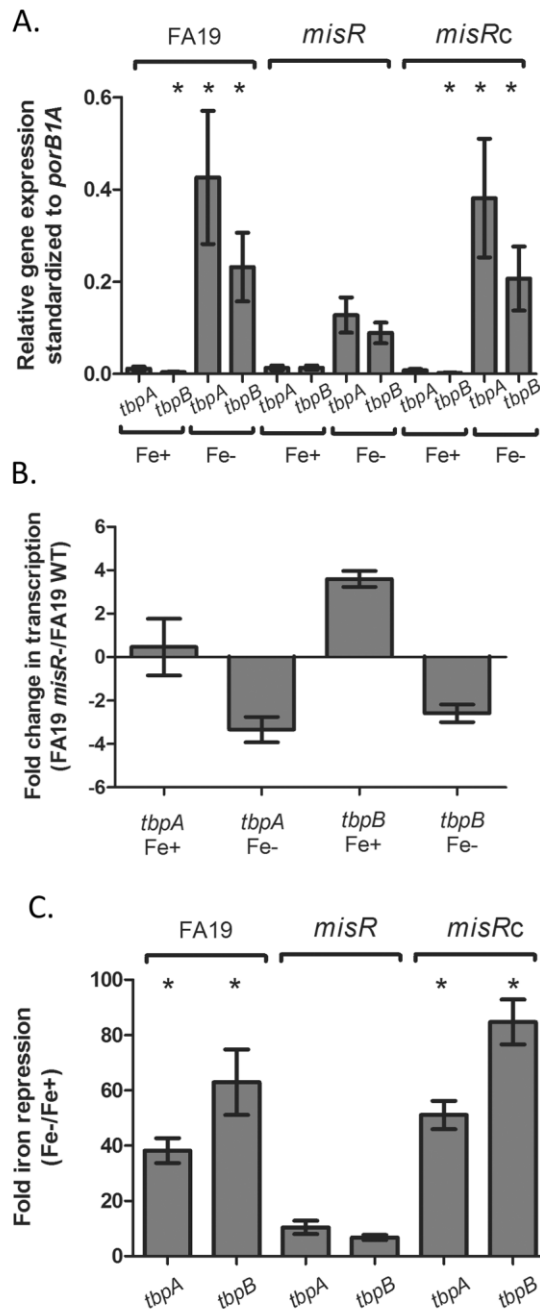

**Fig S1. qRT-PCR demonstrates differential expression of *tbp* genes depending on iron status.** Cultures were grown in GCB medium (Fe+ or Fe-) with 10 mM supplemental Mg<sup>2+</sup> as employed for the RNA-seq experiment in Fig. 1. **Panel A.** Relative gene expression for *tbpA* and *tbpB* genes under iron-replete and iron-depleted conditions for WT, *misR* and *misRc* strains. Shown are the average relative gene expression values (standardized to the *porB1A* gene); error bars represent the standard deviation from the mean. Asterisks demonstrate those values that were significantly different ( $P < 0.05$ ) as compared to the *misR* mutant in pairwise comparisons using an unpaired Student's *t*-test. **Panel B.** The average fold change in expression of the *tbp* genes is shown on the Y-axis and represents the ratio of FA19 *misR*/FA19 WT gene expression (as shown in Fig. 1). Error bars represent standard deviation from the mean for each gene and condition. **Panel C.** Fold iron repression is shown on the Y-axis and represents the relative expression of *tbp* genes under iron-depleted/iron-replete conditions.

The error bars represent the standard deviation from the mean. Asterisks demonstrate those values that were significantly different ( $P < 0.01$ ) as compared to the *misR* mutant in pairwise comparisons using an unpaired Student's *t*-test.
